# Supplementary material
Source: HighWire-hosted journal article supplement (http://molpharm.aspetjournals.org/highwire/filestream/76971/field_highwire_adjunct_files/0/Figure_legends_for_supplemental_data_MOLREVISED.pdf)

Yong Tang, Hossein A. Hamed, Andrew Poklepovic, Yun Dai, Steven Grant, and Paul Dent  
PARP1 modulates the lethality of CHK1 inhibitors in mammary tumors.  
Molecular Pharmacology (2012). **MOL#78907**

**Figure legend for supplemental data.**

**Figure S1. Knock down of PARP1 sensitizes tumor cells to a CHK1 inhibitor.** HCC38 cells were infected with siRNA control (siSCR) or a siRNA to knock down PARP1 (siPARP1). Thirty six hours after transfection, the cells were treated with vehicle (VEH, DMSO) or AZD7762 (10, 30, 50 nM) for 48 hours. Floating and attached cells were isolated after drug exposure and cell viability was measured by trypan blue exclusion ( $\pm$ SEM, n = 3) \* p < 0.05 greater than corresponding value in siSCR cells.

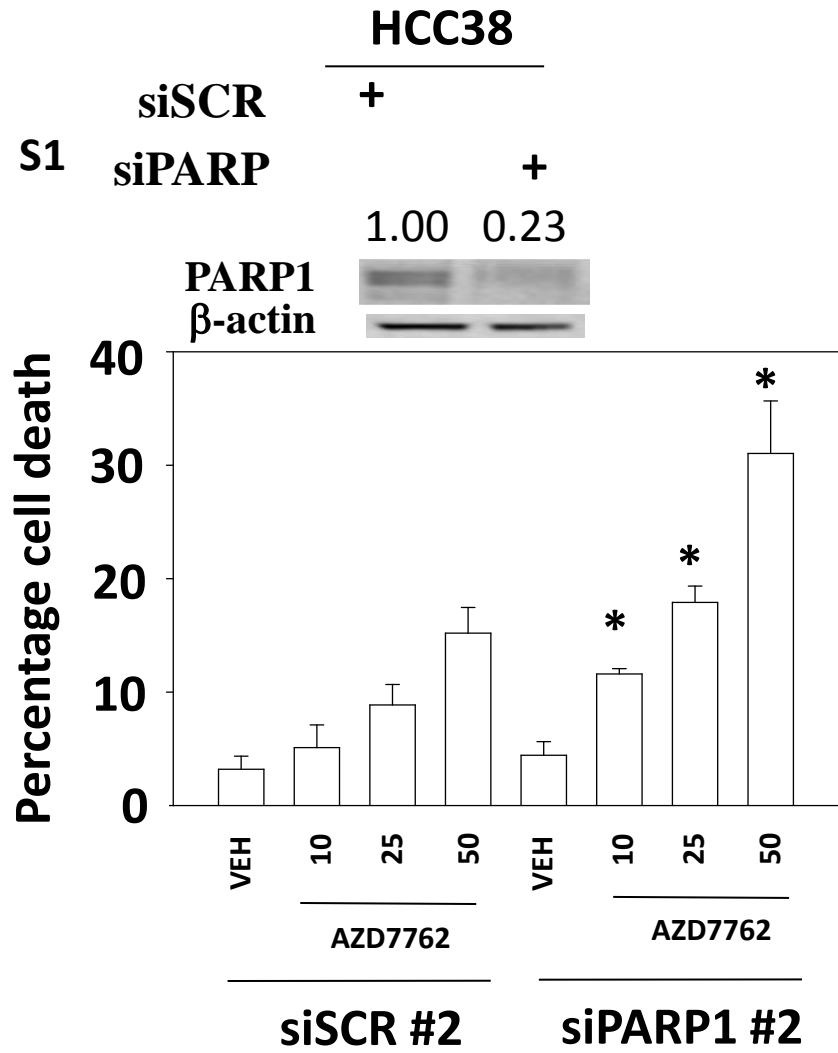

Supplement: Figure_legends_for_supplemental_data_MOLREVISED.pdf [file Figure_legends_for_supplemental_data_MOLREVISED.pdf]
